# Supplementary material for: Effects of daily artificial gravity training on orthostatic tolerance following 60-day strict head-down tilt bedrest
Source: Springer Nature journal article supplement (doi:10.1007/s10286-023-00959-5), 2023-06-22
Supplement: MOESM1 [file 25525230]

Table 1:

Control group

n=8 (6 men, 2 women; Age: 34±8 years; Height: 177±7 cm; Weight: 80±23 kg)

|                                 | Supine pre | Supine post | HUT pre | HUT post | Presyncope pre | Presyncope post |
|---------------------------------|------------|-------------|---------|----------|----------------|-----------------|
| Heart rate (bpm)                | 68±10      | 87±14       | 90±9    | 130±17   | 137±37         | 147±14          |
| Systolic blood pressure (mmHg)  | 135±12     | 138±14      | 135±17  | 133±17   | 102±16         | 112±16          |
| Diastolic blood pressure (mmHg) | 75±9       | 85±12       | 83±13   | 92±15    | 72±15          | 84±17           |
| Plasma volume (ml)              | 3092±382   | 2768±267    |         |          |                |                 |

Table 2:

Continuous artificial gravity group

n=8 (5 men, 3 women; Age: 32±10; Height: 172±8; Weight: 71±10)

|                                 | Supine pre | Supine post | HUT pre | HUT post | Presyncope pre | Presyncope post |
|---------------------------------|------------|-------------|---------|----------|----------------|-----------------|
| Heart rate (bpm)                | 68±11      | 85±14       | 92±20   | 128±30   | 115±18         | 148±33          |
| Systolic blood pressure (mmHg)  | 138±16     | 131±11      | 139±20  | 132±17   | 105±18         | 106±12          |
| Diastolic blood pressure (mmHg) | 75±16      | 74±9        | 83±19   | 88±14    | 70±12          | 75±14           |
| Plasma volume (ml)              | 3977±622   | 2670±444    |         |          |                |                 |

Table 3:

Intermittent artificial gravity group

n=8 (5 men, 3 women; Age: 34±11; Height: 174±11; Weight: 71±5)

|                                 | Supine pre | Supine post | HUT pre | HUT post | Presyncope pre | Presyncope post |
|---------------------------------|------------|-------------|---------|----------|----------------|-----------------|
| Heart rate (bpm)                | 68±18      | 80±18       | 90±21   | 128±25   | 111±25         | 140±18          |
| Systolic blood pressure (mmHg)  | 131±14     | 126±22      | 132±19  | 126±28   | 111±18         | 112±32          |
| Diastolic blood pressure (mmHg) | 73±9       | 70±16       | 81±14   | 82±21    | 73±16          | 78±29           |
| Plasma volume (ml)              | 2894±470   | 2694±500    |         |          |                |                 |

Table 4:

## Control group

|                         | Supine pre    | Supine post  | presyncope pre | Presyncope post |
|-------------------------|---------------|--------------|----------------|-----------------|
| Norepinephrine (nmol/l) | 1.75 ± 0.52   | 1.92 ± 0.52  | 8.43 ± 3.63    | 5.81 ± 2.62     |
| Epinephrine (nmol/l)    | 0.20 ± 0.09   | 0.32 ± 0.19  | 1.33 ± 0.84    | 1.63 ± 1.35     |
| Dopamine (nmol/l)       | 0.07 ± 0.03   | 0.08 ± 0.03  | 0.21 ± 0.13    | 0.18 ± 0.14     |
| Co-Peptin (pmol/L)      | 4.49 ± 1.9    | 4.79 ± 2.01  | 150.7 ± 123.9  | 108.3 ± 91.06   |
| Renine (mE/L)           | 18.29 ± 12.14 | 21.45 ± 8.24 |                |                 |
| Aldosterone (nmol/l)    | 0.16 ± 0.09   | 0.12 ± 0.06  | 0.38 ± 0.26    | 0.38 ± 0.26     |

Table 5:

## Continuous artificial gravity group

|                         | Supine pre    | Supine post  | presyncope pre | Presyncope post |
|-------------------------|---------------|--------------|----------------|-----------------|
| Norepinephrine (nmol/l) | 1.70 ± 0.68   | 1.64 ± 0.67  | 4.61 ± 1.31    | 7.35 ± 3.02     |
| Epinephrine (nmol/l)    | 0.18 ± 0.23   | 0.18 ± 0.1   | 1.01 ± 0.83    | 0.82 ± 0.63     |
| Dopamine (nmol/l)       | 0.06 ± 0.02   | 0.07 ± 0.02  | 0.11 ± 0.05    | 0.16 ± 0.11     |
| Co-Peptin (pmol/L)      | 3.3 ± 0.87    | 3.39 ± 1.37  | 191.2 ± 185.2  | 53.69 ± 48.11   |
| Renine (mE/L)           | 23.94 ± 10.19 | 33.9 ± 13.85 |                |                 |
| Aldosterone (nmol/l)    | 1.08 ± 2.4    | 0.14 ± 0.08  | 0.28 ± 0.10    | 0.33 ± 0.14     |

Table 6:  
Intermittent artificial gravity group

|                         | Supine pre   | Supine post   | presyncope pre | Presyncope post |
|-------------------------|--------------|---------------|----------------|-----------------|
| Norepinephrine (nmol/l) | 1.86 ± 0.46  | 2.06 ± 0.76   | 4.23 ± 1.26    | 6.19 ± 2.34     |
| Epinephrine (nmol/l)    | 0.17 ± 0.13  | 0.25 ± 0.11   | 1.22 ± 0.95    | 1.33 ± 1.50     |
| Dopamine (nmol/l)       | 0.07 ± 0.03  | 0.08 ± 0.02   | 0.11 ± 0.05    | 0.16 ± 0.08     |
| Co-Peptin (pmol/L)      | 4.38 ± 2.27  | 3.49 ± 1.33   | 127.9 ± 93.02  | 60.43 ± 49.19   |
| Renine (mE/L)           | 17.46 ± 9.65 | 27.89 ± 10.92 |                |                 |
| Aldosterone (nmol/l)    | 0.18 ± 0.08  | 0.13 ± 0.08   | 0.20 ± 0.06    | 1.13 ± 2.37     |

Table 1-3: Characteristics and hemodynamics of all subjects listed by groups in supine, early 80° HUT, and at presyncope. The measurements at baseline and early HUT are mean values of five minutes continuous finger blood pressure and heart rate recordings. Mean values for presyncope were collected over a period of maximum 60 seconds (if available) before tilting back.

4-6: Plasma levels of vasoactive hormones obtained in baseline and after presyncope while tilt-table-testing before and after bedrest (pre and post) in each group. Bed rest did not lead to increased values of norepinephrine in iAG and control, but in CAG. The reduction in plasma volume through bed rest did not increase the response of aldosterone secretion, but renine plasma levels were elevated following HDBR in all groups.
